# Supplementary material for: Association between dietary patterns and chronic kidney disease combined with hyperuricemia
Source: Royal Society of Chemistry journal article supplement (doi:10.1039/d3fo03354f), 2023-11-23
Supplement: d3fo03354f1.pdf [file d3fo03354f1.pdf]

**Supplementary Table 1.** Dietary pattern scores and estimated glomerular filtration rate

| Dietary pattern      | $\beta$ value | 95% CI         | $P$ value |
|----------------------|---------------|----------------|-----------|
| Healthy pattern      | 0.18          | (-0.17, 0.54)  | 0.3093    |
| Traditional pattern  | -3.57         | (-3.84, -3.30) | <0.0001   |
| Animal foods pattern | 0.45          | (0.21, 0.68)   | <0.01     |
| Sweet foods pattern  | 0.30          | (0.05, 0.54)   | <0.05     |
| Tea-alcohol pattern  | 0.57          | (0.34, 0.80)   | <0.0001   |

The models were adjusted for age, sex, education level, marital status, smoking status, drinking status, physical activity, overweight/obesity, hypertension, diabetes, hyperlipidemia, total energy.

**Supplementary Table 2.** Dietary pattern scores and blood uric acid levels

| Dietary pattern      | $\beta$ value | 95% CI         | <i>P</i> value |
|----------------------|---------------|----------------|----------------|
| Healthy pattern      | 2.02          | (-0.23, 4.27)  | 0.0781         |
| Traditional pattern  | -6.64         | (-8.34, -4.94) | <0.0001        |
| Animal foods pattern | 3.96          | (2.47, 5.45)   | <0.0001        |
| Sweet foods pattern  | 6.70          | (5.15, 8.26)   | <0.0001        |
| Tea-alcohol pattern  | 4.05          | (2.57, 5.53)   | <0.0001        |

The models were adjusted for age, sex, education level, marital status, smoking status, drinking status, physical activity, overweight/obesity, hypertension, diabetes, hyperlipidemia, total energy.
